# Supplementary material
Source: MDPI journal article supplement (https://www.mdpi.com/2077-0472/12/4/558)
Supplement: s1 [file s1 › agriculture-1618117-supplementary.pdf]

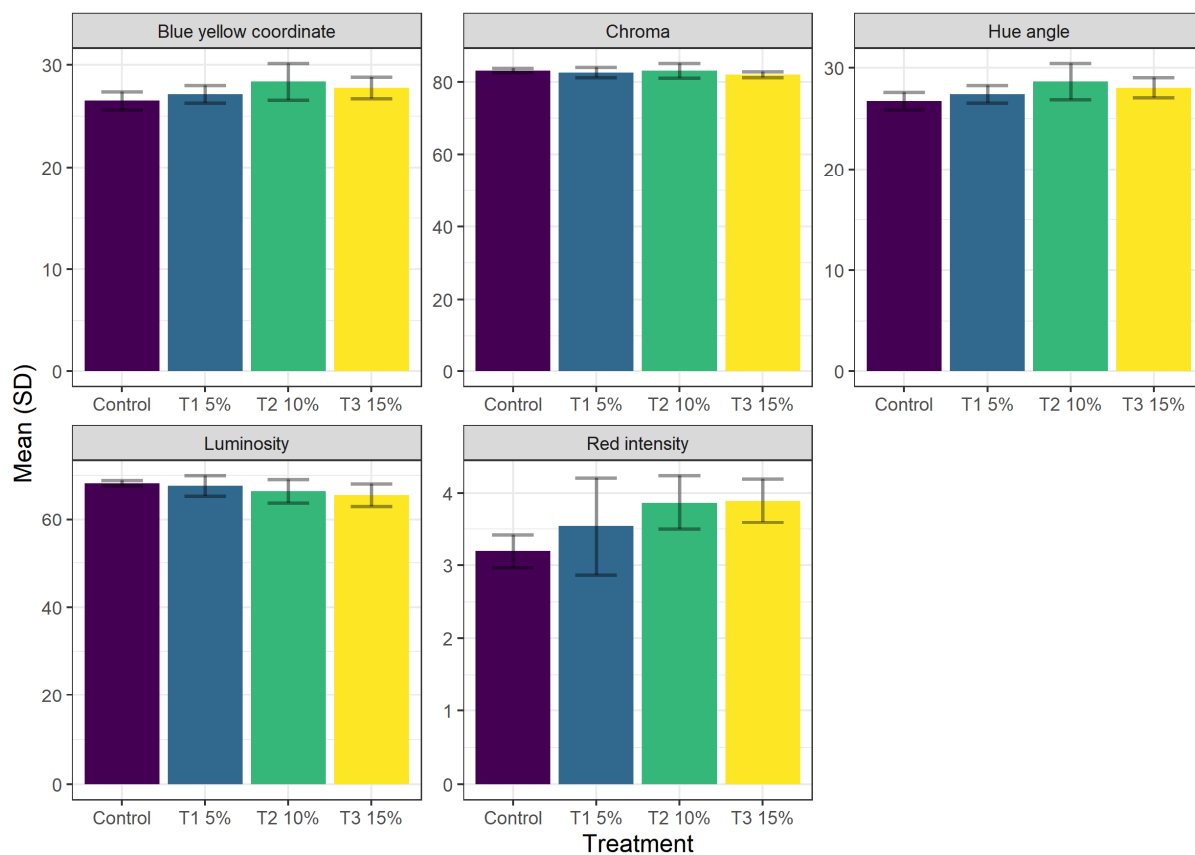

**Figure S1.** Color adimensional values of blue/yellow coordinate, chroma, hue angle, luminosity, and red intensity variables of sweet potato tuberos from plants treated with calcium oxide particle films at three concentrations (5, 10, and 15% w/v) and control (water). Values represent mean ( $\pm$  standard deviation). We did not found differences among treatments: blue/yellow coordinate ( $F = 1.79$ ;  $df = 3, 9$ ;  $P = 0.21$ ), chroma ( $F = 0.67$ ;  $df = 3, 9$ ;  $P = 0.58$ ), hue angle ( $F = 1.97$ ;  $df = 3, 9$ ;  $P = 0.19$ ), luminosity ( $F = 2.03$ ;  $df = 3, 9$ ;  $P = 0.18$ ), and red intensity ( $F = 2.30$ ;  $df = 3, 9$ ;  $P = 0.15$ ).

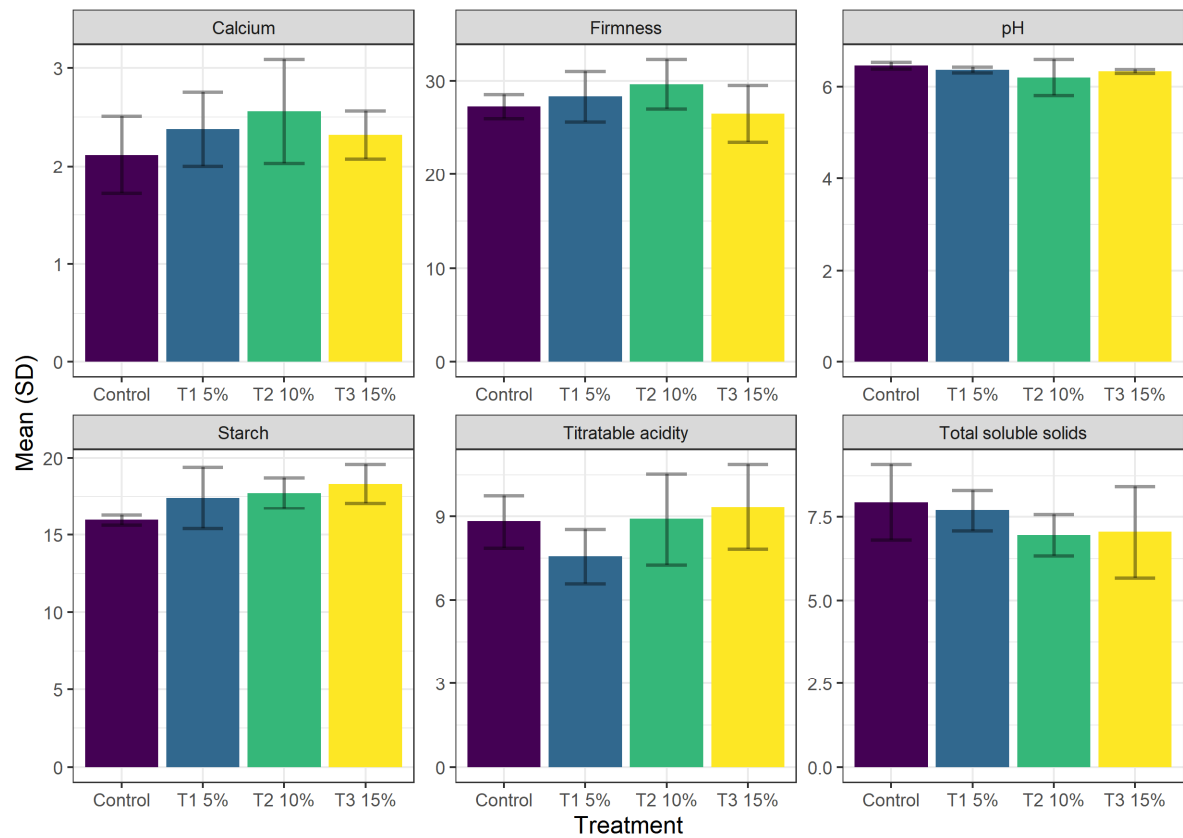

**Figure S2.** Calcium (%), firmness (N), pH, starch content (%), titratable acidity (g 100g), and total soluble solids (°Brix) of sweet potato tuberos from plants treated with calcium oxide particle films at three concentrations (5, 10, and 15% w/v) and control (water). Values represent mean ( $\pm$  standard deviation). We did not found differences among treatments: calcium content ( $F = 74.21$ ;  $df = 3, 9$ ;  $P < 0.0001$ ), firmness ( $F = 0.92$ ;  $df = 3, 9$ ;  $P = 0.47$ ), pH ( $F = 1.09$ ;  $df = 3, 9$ ;  $P = 0.40$ ), starch content ( $F = 2.42$ ;  $df = 3, 9$ ;  $P = 0.29$ ) titratable acidity ( $F = 1.11$ ;  $df = 3, 9$ ;  $P = 0.39$ ), and total soluble solids ( $F = 1.09$ ;  $df = 3, 9$ ;  $P = 0.41$ ).
